# Supplementary material for: Residual weakly bound ligands influence biological compatibility of mixed ligand shell, thiol-stabilized gold nanoparticles
Source: Royal Society of Chemistry journal article supplement (doi:10.1039/c7en00363c), 2017-01-01
Supplement: c7en00363c1.pdf [file c7en00363c1.pdf]

## Supporting Information

### **Residual Weakly Bound Ligands Influence Biological Compatibility of Mixed Ligand Shell, Thiol-Stabilized Gold Nanoparticles**

Lisa Truong,<sup>a</sup> Tatiana Zaikova,<sup>b</sup> Nicole M. Schaeublin,<sup>c</sup> Ki-Tae Kim,<sup>d</sup> Saber M. Hussain,<sup>c</sup>  
James E. Hutchison,<sup>b</sup> and Robert L. Tanguay<sup>a</sup>

<sup>a</sup> Department of Environmental and Molecular Toxicology, Oregon State University, Corvallis, Oregon 97331, United States, <sup>b</sup> Department of Chemistry and Biochemistry, University of Oregon, Eugene, Oregon 97403, <sup>c</sup> Molecular Bioeffects Branch, Bioeffects Division, Airman System Directorate, 711th Human Performance Wing, Air Force Research Laboratory , Wright-Patterson AFB, Ohio 45433, United States, <sup>d</sup> Department of Environmental Engineering, Seoul National University of Science & Technology, Seoul 01811, South Korea.

Number of pages: 4 (This page is not included)

Number of figures: 4

Number of tables: 3

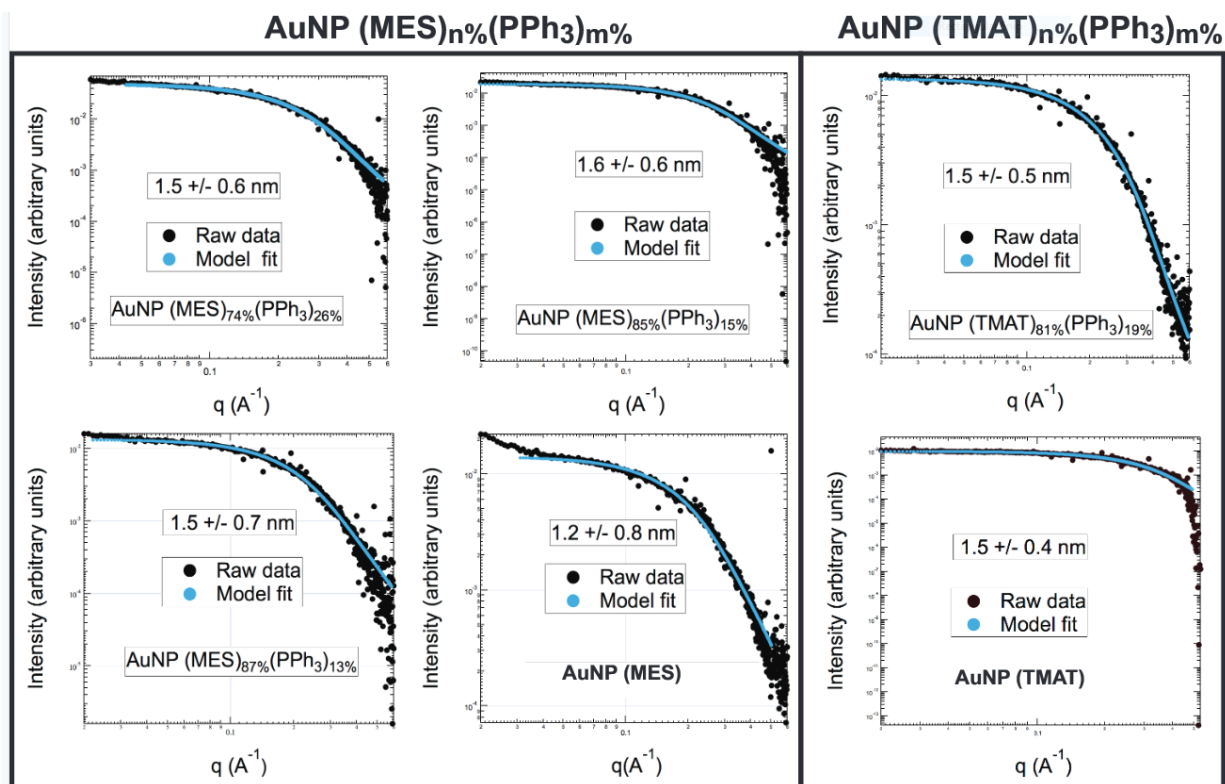

**Figure S1.** SAXS patterns with model fit for 2-mercaptoethanesulfonate (MES)/triphenylphosphine (PPh<sub>3</sub>) and *N,N,N*-trimethylammoniummethanethiol (TMAT)/PPh<sub>3</sub>-protected AuNPs

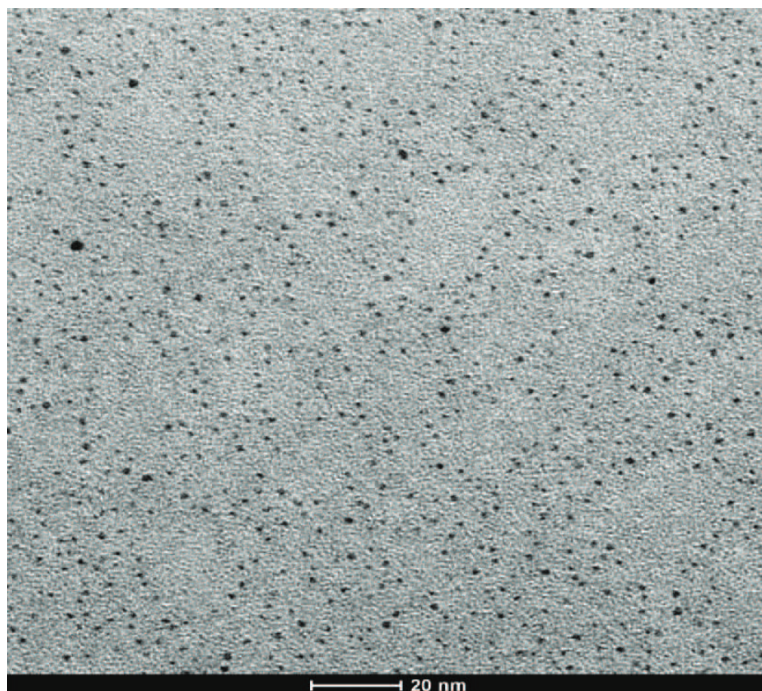

**Figure S2.** Representative TEM image of AuNP (MES)<sub>74%</sub>(PPh<sub>3</sub>)<sub>26%</sub>. Average particles size  $1.4 \pm 0.4$  nm (number of particles analyzed=975)

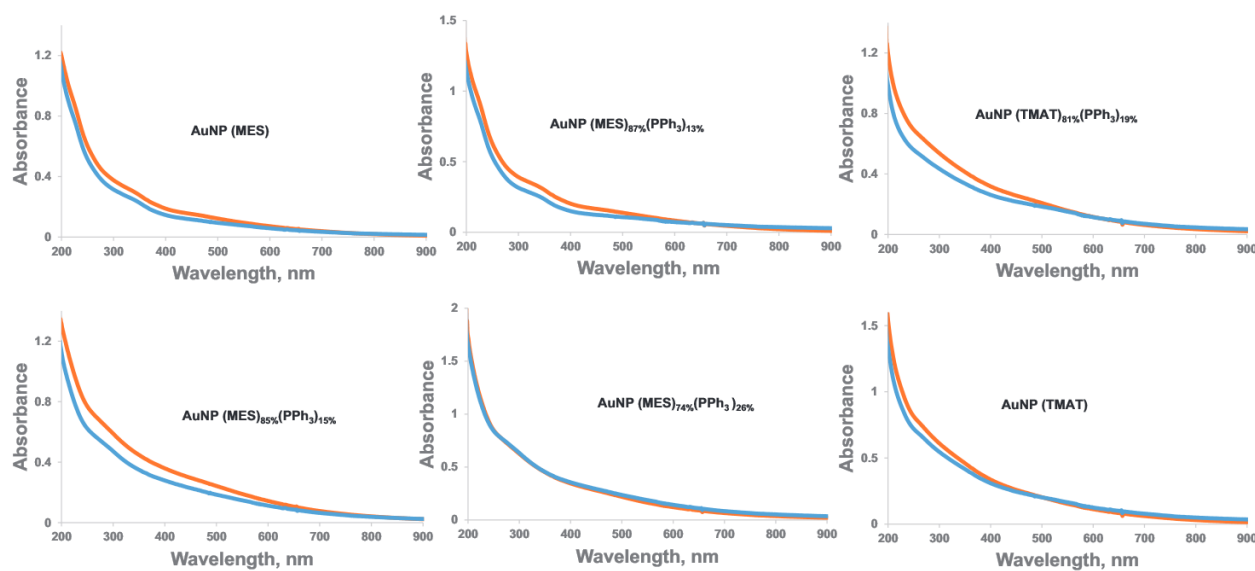

**Figure S3.** UV-vis spectra of MES, MES/TPP, TMAT and TMAT/TPP AuNPs in EM: starting solution (red) and after 5 days (blue). The concentration was 50 mg/L.

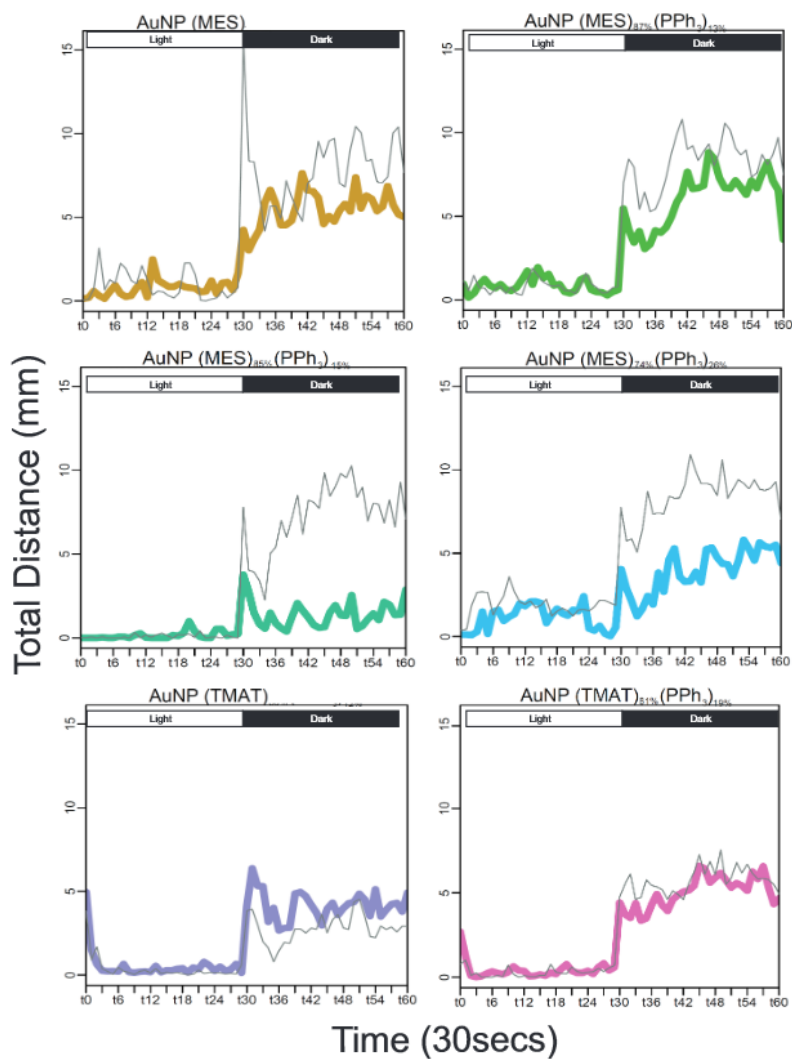

**Figure S4.** TPP content impacts larval photomotor response.

Embryos exposed to 10  $\mu\text{g/mL}$  of varying AuNPs were evaluated for a predictable photomotor response following 180s in the light, and then the dark. Typical behavior is low movement in the light, and then a sharp increase in the dark that levels out. Each panel represents the response to a particular AuNP, and the respective control.

**Table S1.** Zeta potential measurements for AuNPs Day 0 (10 minutes after suspension made) and Day 5 (the time when the zebrafish experiment is completed). Measurements are represented as the mean of triplicate measurements with 10 scans  $\pm$  the standard deviation.

| Sample                                                       | 0 day             | 5 day             |
|--------------------------------------------------------------|-------------------|-------------------|
| AuNP (MES)                                                   | -18.62 $\pm$ 2.33 | -22.56 $\pm$ 1.18 |
| AuNP (MES) <sub>87%</sub> (PPh <sub>3</sub> ) <sub>13%</sub> | -16.24 $\pm$ 1.74 | -20.94 $\pm$ 1.42 |
| AuNP (MES) <sub>85%</sub> (PPh <sub>3</sub> ) <sub>15%</sub> | -18.62 $\pm$ 1.14 | -20.58 $\pm$ 1.11 |
| AuNP (MES) <sub>74%</sub> (PPh <sub>3</sub> ) <sub>26%</sub> | -16.08 $\pm$ 0.92 | -21.44 $\pm$ 1.59 |
| AuNP (TMAT)                                                  | 9.87 $\pm$ 3.59   | 13.42 $\pm$ 0.50  |
| AuNP (MES) <sub>81%</sub> (PPh <sub>3</sub> ) <sub>19%</sub> | 10.83 $\pm$ 2.98  | 12.15 $\pm$ 1.85  |

**Table S2.** Atomic percentages and standard deviation for elements present in AuNPs determined by X-ray photoelectron spectroscopy (XPS). nd = not detected.

| % (SD)                                                               | Au4f      | S2p (reduced) | S2p (oxidized) | P2p                            | C1s       | N1s      | F1s      | O1s       |
|----------------------------------------------------------------------|-----------|---------------|----------------|--------------------------------|-----------|----------|----------|-----------|
| Mica                                                                 | nd        | nd            | nd             | nd                             | 1.7(0.2)  | nd       | nd       | 68.5(0.3) |
| 1.5 nm AuNP (MES) <sub>74%</sub> (PPh <sub>3</sub> ) <sub>26%</sub>  | 14.6(0.8) | 5.7(0.4)      | 7.6(0.4)       | 2.0(0.3)                       | 44.4(1.0) | nd       | nd       | 18.5(0.9) |
| 1.6 nm AuNP (MES) <sub>85%</sub> (PPh <sub>3</sub> ) <sub>15%</sub>  | 10.7(0.8) | 4.6(0.4)      | 6.0(0.4)       | 0.8(0.1)                       | 44.1(2.8) | nd       | nd       | 23.0(0.6) |
| 1.5 nm AuNP (MES) <sub>87%</sub> (PPh <sub>3</sub> ) <sub>13%</sub>  | 5.7(0)    | 4.1(0.1)      | 4.9(0.1)       | 0.6(0.1)                       | 49.2(0.5) | nd       | nd       | 24.2(0.2) |
| 1.2 nm AuNP (MES)                                                    | 5.5(0)    | 3.9(0.3)      | 6.0(0.4)       | nd                             | 49.7(6.6) | nd       | nd       | 29.0(5.5) |
| 1.5 nm AuNP (TMAT) <sub>81%</sub> (PPh <sub>3</sub> ) <sub>19%</sub> | 6.6(0.7)  | 2.6(0.2)      | nd             | 0.6(0)                         | 53.6(1.5) | 2.3(0.4) | 5.0(1.1) | 19.6(0.3) |
| 1.5 nm AuNP (TMAT)                                                   | 5.2(1.1)  | 2.8(0.5)      | nd             | Traces (below detection limit) | 49.1(3.5) | 2.9(0.5) | 4.0(0.9) | 25.8(3.5) |

**Table S3.** Primer Sequences

| Gene           | Forward Primer (5'- 3') | Reverse Primer (5'- 3') |
|----------------|-------------------------|-------------------------|
| gst p1         | TTCAGTCCAACGCCATGC      | ATGAGATCTGATCGCCAACC    |
| gclc           | CTATCTGGGAAACATGGAGG    | CATTTTCCTCTGTTGACCGG    |
| gclm           | TGGCTTCGTGACACACTAAAGT  | TCACGGGAACATTAAACAGGC   |
| gpx3           | AAGAACGCATGTCCGCCTGTAG  | ACCTGCAGAAACCCTGTGTTGAC |
| $\beta$ -actin | AAGCAGGAGTACGATGAGTC    | TGGAGTCCTCAGATGCATTG    |
